# Supplementary material
Source: PubMed Central journal article supplement (PMC6941348)
Supplement: NIHMS1061458-supplement-supp.pdf [file NIHMS1061458-supplement-supp.pdf]

SUPPLEMENTAL MATERIAL

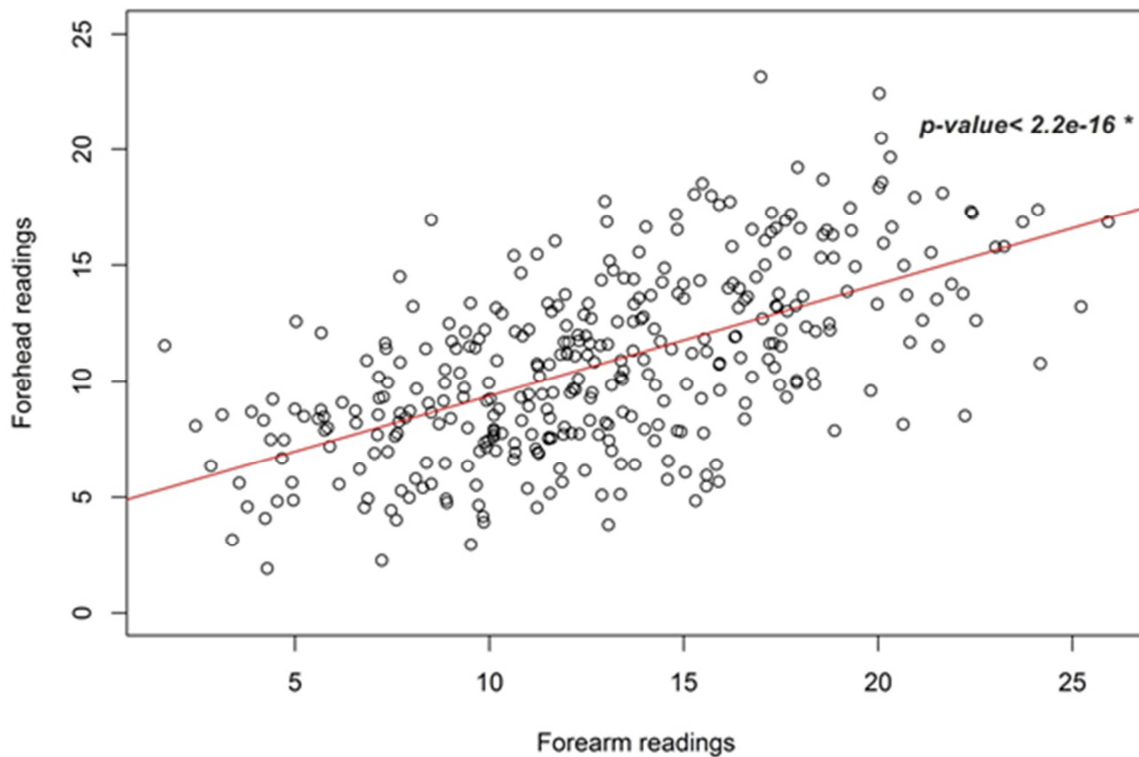

**Figure S1.** Intra-Individual correlation between spectrophotometer readings obtained at the forearm and forehead among 350 skin cancer screening patients enrolled in year 1 of the VIRUSCAN study. \*The p-value was calculated using Spearman correlation, with correlation coefficient  $\rho=0.6079$ .

**Figure S2**

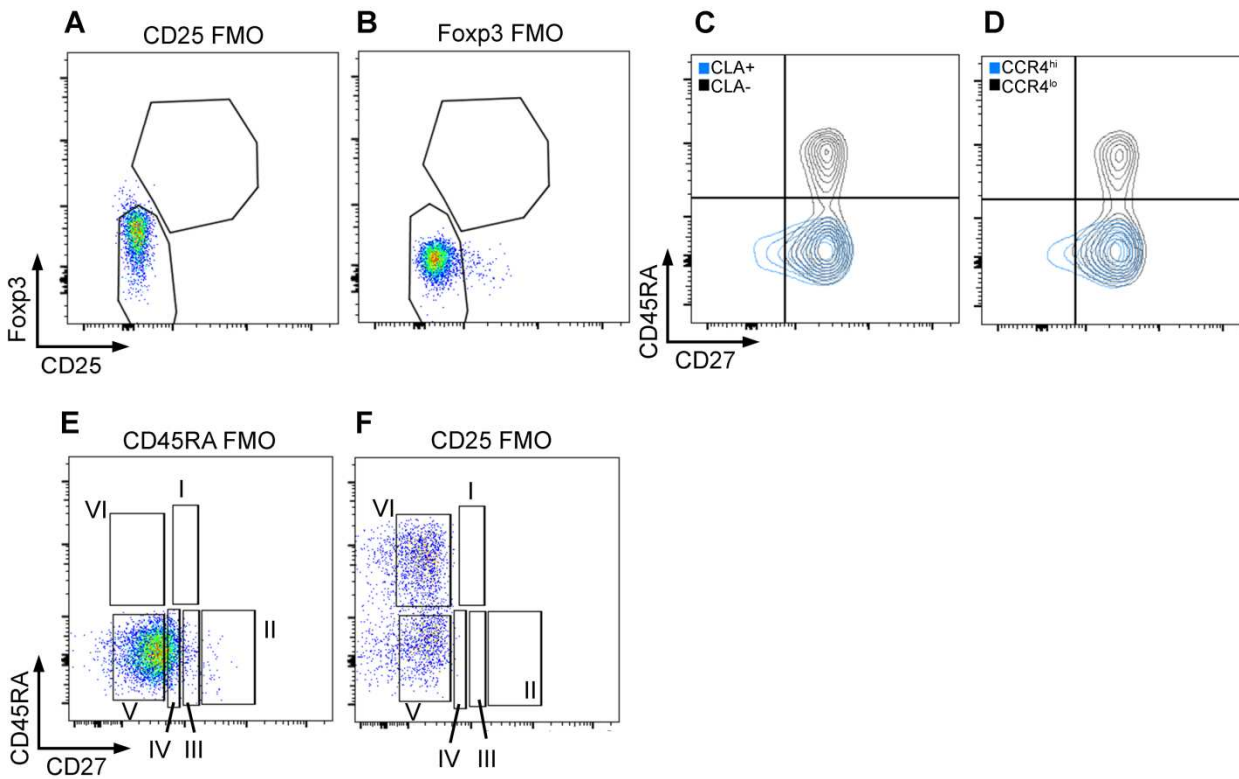

**Fig S2.** PBMCs were gated first on viability and on CD3 and CD4 positivity. (A-B) CD25 and Fxp3 fluorescence-minus-one (FMO) control samples used to define CD25<sup>+</sup> Fxp3<sup>+</sup> Treg populations, (C-D) CLA<sup>+</sup> and CCR4<sup>hi</sup> Th CD4<sup>+</sup> T cells were confirmed to be CD45RA<sup>-</sup> with mixed expression of CD27, (E-F) CD45RA and CD25 FMO control samples used to defined Group I-VI.

**Table S1 Circulating regulatory T (Treg) cell phenotypes and questionnaire factors.**

|                                                  | Treg cell phenotypes                           |                        |                              |                                                |                              |                        |                              |                         |                              |
|--------------------------------------------------|------------------------------------------------|------------------------|------------------------------|------------------------------------------------|------------------------------|------------------------|------------------------------|-------------------------|------------------------------|
|                                                  | CD45RA <sup>+</sup> /CD27 <sup>+</sup><br>Treg |                        |                              | CD45RA <sup>-</sup> /CD27 <sup>-</sup><br>Treg |                              | CLA <sup>+</sup> Treg  |                              | CCR4 <sup>hi</sup> Treg |                              |
|                                                  | n (%)                                          | Mean (SD) <sup>1</sup> | <i>p</i> -value <sup>2</sup> | Mean (SD) <sup>1</sup>                         | <i>p</i> -value <sup>2</sup> | Mean (SD) <sup>1</sup> | <i>p</i> -value <sup>2</sup> | Mean (SD) <sup>1</sup>  | <i>p</i> -value <sup>2</sup> |
| <b>Reaction to 1 hour of sun exposure</b>        |                                                |                        |                              |                                                |                              |                        |                              |                         |                              |
| No change                                        | 11 (3.2)                                       | 15.6 (17.8)            |                              | 14.9 (7.6)                                     |                              | 53.8 (12.6)            |                              | 79.1 (10.8)             |                              |
| Tans without sunburn                             | 68 (19.7)                                      | 10.8 (9.4)             | 0.28                         | 13.5 (7.9)                                     | 0.54                         | 55.5 (12.2)            | 0.65                         | 81.8 (10.1)             | 0.31                         |
| Mild sunburn with tan                            | 150 (43.4)                                     | 10.1 (6.8)             | 0.27                         | 13.2 (6.6)                                     | 0.57                         | 57.5 (9.7)             | 0.24                         | 83.2 (7.8)              | 0.14                         |
| Sunburn without blisters                         | 100 (28.9)                                     | 10.0 (9.7)             | 0.08                         | 13.7 (5.8)                                     | 0.99                         | 59.3 (11.2)            | 0.05                         | 83.4 (8.4)              | 0.05                         |
| Blistering sunburn                               | 17 (4.9)                                       | 8.4 (6.0)              | 0.06                         | 18.3 (10.7)                                    | 0.15                         | 56.5 (16.5)            | 0.27                         | 82.0 (9.2)              | 0.17                         |
| <b>Ever had a job working in the sun</b>         |                                                |                        |                              |                                                |                              |                        |                              |                         |                              |
| No                                               | 249 (72.0)                                     | 10.5 (9.1)             |                              | 13.5 (6.9)                                     |                              | 57.7 (11.2)            |                              | 82.5 (8.5)              |                              |
| Yes                                              | 97 (28.0)                                      | 9.7 (7.7)              | 0.90                         | 14.2 (7.3)                                     | 0.89                         | 57.0 (11.1)            | 0.07                         | 83.6 (9.0)              | 0.90                         |
| <b>Years of job in the sun</b>                   |                                                |                        |                              |                                                |                              |                        |                              |                         |                              |
| No                                               | 249 (72.4)                                     | 10.5 (9.1)             |                              | 13.5 (6.9)                                     |                              | 57.7 (11.2)            |                              | 82.5 (8.5)              |                              |
| Less than 5                                      | 52 (15.1)                                      | 10.4 (9.3)             | 0.95                         | 14.3 (7.5)                                     | 0.81                         | 55.2 (11)              | 0.01                         | 82.2 (9.2)              | 0.19                         |
| 6 to 10                                          | 10 (2.9)                                       | 10.2 (7.1)             | 0.62                         | 14.7 (7.3)                                     | 0.98                         | 61.5 (13.8)            | 0.73                         | 85.2 (11.1)             | 0.50                         |
| more than 10                                     | 33 (9.6)                                       | 7.9 (4.4)              | 0.28                         | 14.1 (7.1)                                     | 0.89                         | 58.9 (10)              | 0.92                         | 85.5 (7.9)              | 0.18                         |
| <b>Ever had a blistering sunburn</b>             |                                                |                        |                              |                                                |                              |                        |                              |                         |                              |
| No                                               | 93 (26.9)                                      | 10.0 (8.6)             |                              | 13.6 (6.4)                                     |                              | 57.6 (11.2)            |                              | 82.9 (9.5)              |                              |
| Yes                                              | 253 (73.1)                                     | 10.4 (8.8)             | 0.43                         | 13.8 (7.2)                                     | 0.94                         | 57.4 (11.2)            | 0.89                         | 82.7 (8.3)              | 0.80                         |
| <b>Age of first blistering sunburn</b>           |                                                |                        |                              |                                                |                              |                        |                              |                         |                              |
| Less than or equal to 10                         | 74 (34.7)                                      | 10.3 (11.0)            |                              | 14.4 (7.5)                                     |                              | 58.7 (11.6)            |                              | 83.1 (8.1)              |                              |
| Between 11 to 20                                 | 109 (51.2)                                     | 10.1 (6.4)             | 0.62                         | 13.6 (7.0)                                     | 0.66                         | 56.7 (10.6)            | 0.34                         | 82.5 (8.6)              | 0.86                         |
| Above 20                                         | 30 (14.1)                                      | 10.8 (11.3)            | 0.85                         | 11.7 (4.7)                                     | 0.26                         | 58.0 (9.9)             | 0.91                         | 82.6 (7.4)              | 0.97                         |
| <b>Blistering sunburn frequency in last year</b> |                                                |                        |                              |                                                |                              |                        |                              |                         |                              |
| None                                             | 321 (93.0)                                     | 10.3 (8.3)             |                              | 13.6 (6.8)                                     |                              | 57.3 (11.1)            |                              | 82.7 (8.7)              |                              |

|                                      |            |                |      |            |      |             |      |            |      |
|--------------------------------------|------------|----------------|------|------------|------|-------------|------|------------|------|
| More than once                       | 24 (7.0)   | 10.7<br>(13.9) | 0.57 | 15.4 (8.9) | 0.37 | 59.2 (12.1) | 0.34 | 83.7 (8.3) | 0.48 |
| <b>Natural skin tone<sup>3</sup></b> |            |                |      |            |      |             |      |            |      |
| Lighter                              | 175 (50.0) | 10.3 (9.3)     |      | 13.5 (6.4) |      | 58.2 (10.2) |      | 83.3 (7.8) |      |
| Darker                               | 175 (50.0) | 10.4 (8.0)     | 0.70 | 13.9 (7.4) | 0.55 | 56.9 (12.1) | 0.42 | 82.2 (9.3) | 0.82 |

<sup>1</sup>SD=Standard deviation

<sup>2</sup>*p*-values were calculated using linear regression, adjusted for age (categorical) and sex with transformed Treg data as follows: CD45RA<sup>+</sup>/CD27<sup>+</sup> Treg (8th root), CD45RA<sup>-</sup>/CD27<sup>-</sup> Treg (4th root), CLA<sup>+</sup> Treg and CCR4<sup>hi</sup> Treg (4th power).

<sup>3</sup>Natural skin tone based on median spectrophotometer readings in the axilla, as defined in *Materials and Methods*.

**Table S2** Quartiles of total Tregs, CLA<sup>+</sup> and CCR4<sup>hi</sup> Tregs and UV spectrophotometer readings in all individuals and stratified by natural skin tone.

| Treg cell phenotypes <sup>2</sup> | Average UV spectrophotometer reading |                        |                         |                                   |               |                  |                     |               |                  |
|-----------------------------------|--------------------------------------|------------------------|-------------------------|-----------------------------------|---------------|------------------|---------------------|---------------|------------------|
|                                   | All (n=350)                          |                        |                         | Lighter skin <sup>1</sup> (n=175) |               |                  | Darker skin (n=175) |               |                  |
|                                   | n                                    | Mean (SD) <sup>3</sup> | OR (95%CI) <sup>4</sup> | n                                 | Mean (SD)     | OR (95%CI)       | n                   | Mean (SD)     | OR (95%CI)       |
| <b>Total Treg</b>                 |                                      |                        |                         |                                   |               |                  |                     |               |                  |
| Q1                                | 88                                   | 11.74 (3.92)           | 1.0 (ref.)              | 43                                | 13.28 (4.05)  | 1.0 (ref.)       | 45                  | 10.28 (3.21)  | 1.0 (ref.)       |
| Q2                                | 87                                   | 11.89 (3.86)           | 1.00 (0.89-1.11)        | 42                                | 13.34 (4.11)  | 0.96 (0.81-1.12) | 45                  | 10.54 (3.09)  | 1.05 (0.87-1.26) |
| Q3                                | 88                                   | 12.35 (4.00)           | 0.99 (0.89-1.10)        | 47                                | 13.14 (3.98)  | 0.93 (0.80-1.08) | 41                  | 11.44 (3.87)  | 1.04 (0.88-1.23) |
| Q4                                | 87                                   | 11.26 (3.69)           | 0.89 (0.79-0.99)        | 43                                | 12.85 (3.59)  | 0.86 (0.72-1.02) | 44                  | 9.70 (3.11)   | 0.84 (0.68-1.02) |
|                                   |                                      | P-trend: 0.07          |                         |                                   | P-trend: 0.11 |                  |                     | P-trend: 0.23 |                  |
| <b>CLA<sup>+</sup> Treg</b>       |                                      |                        |                         |                                   |               |                  |                     |               |                  |
| Q1                                | 92                                   | 11.25 (3.47)           | 1.0 (ref.)              | 38                                | 12.38 (3.75)  | 1.0 (ref.)       | 54                  | 10.46 (3.05)  | 1.0 (ref.)       |
| Q2                                | 84                                   | 11.52 (4.15)           | 1.02 (0.92-1.14)        | 45                                | 13.06 (4.19)  | 1.03 (0.87-1.21) | 39                  | 9.75 (3.38)   | 0.93 (0.78-1.10) |
| Q3                                | 86                                   | 11.85 (3.61)           | 1.00 (0.89-1.12)        | 51                                | 12.80 (3.63)  | 0.96 (0.80-1.13) | 35                  | 10.47 (3.15)  | 0.92 (0.76-1.12) |
| Q4                                | 88                                   | 12.63 (4.15)           | 1.07 (0.97-1.19)        | 41                                | 14.40 (3.91)  | 1.16 (0.99-1.37) | 47                  | 11.08 (3.76)  | 1.00 (0.85-1.17) |
|                                   |                                      | P-trend: 0.25          |                         |                                   | P-trend: 0.13 |                  |                     | P-trend: 0.89 |                  |
| <b>CCR4<sup>hi</sup> Treg</b>     |                                      |                        |                         |                                   |               |                  |                     |               |                  |
| Q1                                | 89                                   | 11.09 (3.77)           | 1.0 (ref.)              | 40                                | 12.93 (4.13)  | 1.0 (ref.)       | 49                  | 9.59 (2.65)   | 1.0 (ref.)       |
| Q2                                | 89                                   | 11.57 (3.83)           | 1.06 (0.95-1.18)        | 44                                | 12.64 (3.75)  | 1.00 (0.85-1.18) | 45                  | 10.51 (3.65)  | 1.13 (0.95-1.35) |
| Q3                                | 85                                   | 11.86 (3.96)           | 0.99 (0.89-1.11)        | 47                                | 12.77 (3.92)  | 0.92 (0.78-1.08) | 38                  | 10.73 (3.75)  | 1.05 (0.86-1.27) |
| Q4                                | 87                                   | 12.75 (3.81)           | 1.07 (0.97-1.18)        | 44                                | 14.26 (3.74)  | 1.08 (0.94-1.26) | 43                  | 11.21 (3.26)  | 1.08 (0.90-1.30) |
|                                   |                                      | P-trend: 0.61          |                         |                                   | P-trend: 0.42 |                  |                     | P-trend: 0.84 |                  |

<sup>1</sup>Natural skin tone based on median spectrophotometer readings in the axilla, as defined in *Materials and Methods*.

<sup>2</sup>Tregs were categorized into quartiles using cut-offs as the following:

Total Treg: 2.73-4.01-5.28, CLA<sup>+</sup> Treg: 50-57.8-65.58, CCR4<sup>hi</sup> Treg: 77.9-84.2-89.2

<sup>3</sup>SD=standard deviation

<sup>4</sup>Odds ratios (OR) and 95% confidence intervals (CI) for average spectrophotometer reading were calculated using logistic regression, comparing each risk group to the reference group Q1

<sup>5</sup>p-trend was calculated using ordinal logistic regression
